# Supplementary material
Source: HighWire-hosted journal article supplement (https://ejhp.bmj.com/highwire/filestream/151331/field_highwire_adjunct_files/0/ejhpharm-2021-002903supp001_data_supplement.pdf)
Supplement: ejhpharm-2021-002903supp001_data_supplement.pdf [file ejhpharm-2021-002903supp001_data_supplement.pdf]

## Supplemental information – A

### 1 Content of the Lothian Midwife Formulary: LIST OF MONOGRAPHS IN BNF ORDER

#### Gastro-Intestinal System: Introduction

- Antacids: \* Co-magaldrox (Mucogel®)  
 • Compound Alginates (Peptac®)
- Laxatives: \* Glycerol (glycerin) suppositories  
 • Ispaghula husk (Fybogel®)  
 • Lactulose
- Preparations for haemorrhoids: \* Anusol® cream  
 \* Anusol® suppositories

Antispasmodics: Peppermint water

#### Cardiovascular: Introduction

- Dalteparin PGD 356A

#### Anaphylaxis: Introduction

- Adrenaline (epinephrine) 1 in 1000

#### Central Nervous System (CNS): Introduction - including morphine care pathway

Drugs used in nausea: Cyclizine injection

- Analgesics: \* Diclofenac suppositories  
 • Dihydrocodiene tablets PGD 172A  
 • Equanox® or Entonox®  
 • Ibuprofen tablets  
 • Morphine injection  
 • Paracetamol tablets, suspension, and suppositories

#### Genito-urinary System

##### Contraception: Introduction

- Desogestrel PGD 345AV1
- Etonogestrel PGD 347AV1
- Lidocaine PGD 346AV1
- Norethisterone PGD 344AV1

##### Obstetrics: Introduction

- Dinoprostone (Propess®) PGD 236V2A
- Ergometrine
- Oxytocin (Syntocinon®)- 3rd stage
- Oxytocin (Syntocinon®)- PPH
- Syntometrine® PPH

##### Mendelson's syndrome: Introduction

- Ranitidine PGD 171A

#### Nutrition and blood

##### Phytomenadione (Vitamin K) in neonate: Introduction

- \* Phytomenadione (Konakion MM Paediatric®) - IM and oral

##### Iron and the management of anaemia: Introduction

- Ferrous fumarate tablets
- Ferrous sulphate tablets

##### Local Anaesthetics: Introduction

- Instillagel®
- Lidocaine - IV cannulation
- Lidocaine –for perineum
- Tetracaine gel (Ametop®)

##### Immunological Products: Introduction

- Anti D Immunoglobulin Antenatal 1500units (D-GAM® and Rhophylac®)
- Anti D Immunoglobulin Postnatal 500units (D-GAM®)
- Anti D Immunoglobulin Postnatal 1500units (D-GAM® and Rhophylac®)
